# Supplementary material for: Exposure to Occupational Hazards among Health Care Workers in Low- and Middle-Income Countries: A Scoping Review
Source: MDPI journal article supplement (doi:10.3390/ijerph18052603), 2021-03-05
Supplement: s1 [file s1]

**Exposure to occupational hazards among healthcare workers in low- and middle-income countries: A scoping review**

**Supplementary Table. Search strategy for Medline (Ovid) (date of search: 01/05/2020)**

| #  | Search terms                                                                                                                                                                                                                               | Results |
|----|--------------------------------------------------------------------------------------------------------------------------------------------------------------------------------------------------------------------------------------------|---------|
| 1  | Health personnel/ or allied health personnel/ or dental staff/ or dentists/ or medical laboratory personnel/ or medical staff/ or nurses/ or nursing staff/ or personnel, hospital/ or pharmacists/ or physical therapists/ or physicians/ | 247759  |
| 2  | Healthcare worker.mp. or exp Health Personnel/                                                                                                                                                                                             | 508882  |
| 3  | Exp Health Personnel/                                                                                                                                                                                                                      | 508239  |
| 4  | Doctors.mp.                                                                                                                                                                                                                                | 79077   |
| 5  | Health worker.mp.                                                                                                                                                                                                                          | 3624    |
| 6  | Exp Nurses/                                                                                                                                                                                                                                | 87604   |
| 7  | Laboratory workers.mp.                                                                                                                                                                                                                     | 872     |
| 8  | Exp Developing Countries/                                                                                                                                                                                                                  | 74246   |
| 9  | Developing Countries/ or low income countries.mp.                                                                                                                                                                                          | 78538   |
| 10 | Developing Countries/ or middle income countries.mp.                                                                                                                                                                                       | 86404   |
| 11 | Low and middle income countries.mp.                                                                                                                                                                                                        | 15851   |
| 12 | 1 or 2 or 3 or 4 or 5 or 6 or 7                                                                                                                                                                                                            | 566760  |
| 13 | 8 or 9 or 10 or 11                                                                                                                                                                                                                         | 90218   |
| 14 | 12 and 13                                                                                                                                                                                                                                  | 5552    |
| 15 | Exp Occupational Health/                                                                                                                                                                                                                   | 32933   |
| 16 | Occupational Health/ or Workplace/ or Occupational Diseases/ or occupational hazards.mp. or Burnout, Professional/ or Occupational Exposure/                                                                                               | 174709  |
| 17 | Occupational Health/ or Occupational Diseases/ or occupational risks.mp. or Occupational Exposure/                                                                                                                                         | 150603  |
| 18 | Exp Occupational Diseases/                                                                                                                                                                                                                 | 130883  |
| 19 | Accidents, Occupational/ or Occupational Diseases/ or Occupational Injuries/                                                                                                                                                               | 99729   |
| 20 | Occupational accidents.mp. or Accidents, Occupational/                                                                                                                                                                                     | 17686   |
| 21 | Occupation.mp. or Occupations/                                                                                                                                                                                                             | 49467   |
| 22 | Workplace Violence/ or Workplace/ or workplace.mp.                                                                                                                                                                                         | 48977   |
| 23 | 15 or 16 or 17 or 18 or 19 or 20 or 21 or 22                                                                                                                                                                                               | 276420  |
| 24 | 14 and 23                                                                                                                                                                                                                                  | 173     |
| 25 | Limit 24 to English language                                                                                                                                                                                                               | 170     |
